# Supplementary material for: Implementing chemical functionality into oriented films of metal–organic frameworks on self-assembled monolayers
Source: Royal Society of Chemistry journal article supplement (doi:10.1039/c0jm04526h), 2011-01-01
Supplement: c0jm04526h.pdf [file c0jm04526h.pdf]

## Supporting Information

# Implementing chemical functionality into oriented films of metal-organic frameworks on self- assembled monolayers

*Camilla Scherb<sup>a</sup>, Jennifer J. Williams<sup>b</sup>, Florian Hinterholzinger<sup>a</sup>, Sebastian Bauer<sup>c</sup>, Norbert  
Stock<sup>c</sup>, and Thomas Bein<sup>\*a</sup>*

Department of Chemistry and Center for NanoScience (CeNS), University of Munich  
(LMU),

Butenandtstr. 11 (Gerhard-Ertl-Building, E), 81377 Munich (Germany), [bein@lmu.de](mailto:bein@lmu.de)

<sup>a</sup> Department of Chemistry and Center for NanoScience (CeNS), University of Munich (LMU), Butenandtstr. 11 (Gerhard-Ertl-Building, E), 81377 Munich (Germany), Phone: (+49)89218077621, Fax: (+49)89218077622; Homepage: [www.cup.uni-muenchen.de/pc/bein](http://www.cup.uni-muenchen.de/pc/bein).

<sup>b</sup> Institute for Materials and Processes, School of Engineering, University of Edinburgh, EH9 3JL, United Kingdom.

<sup>c</sup> Department of Inorganic Chemistry, Christian-Albrechts-University of Kiel, Otto-Hahn-Platz, 6/7, 24098 Kiel, Germany.

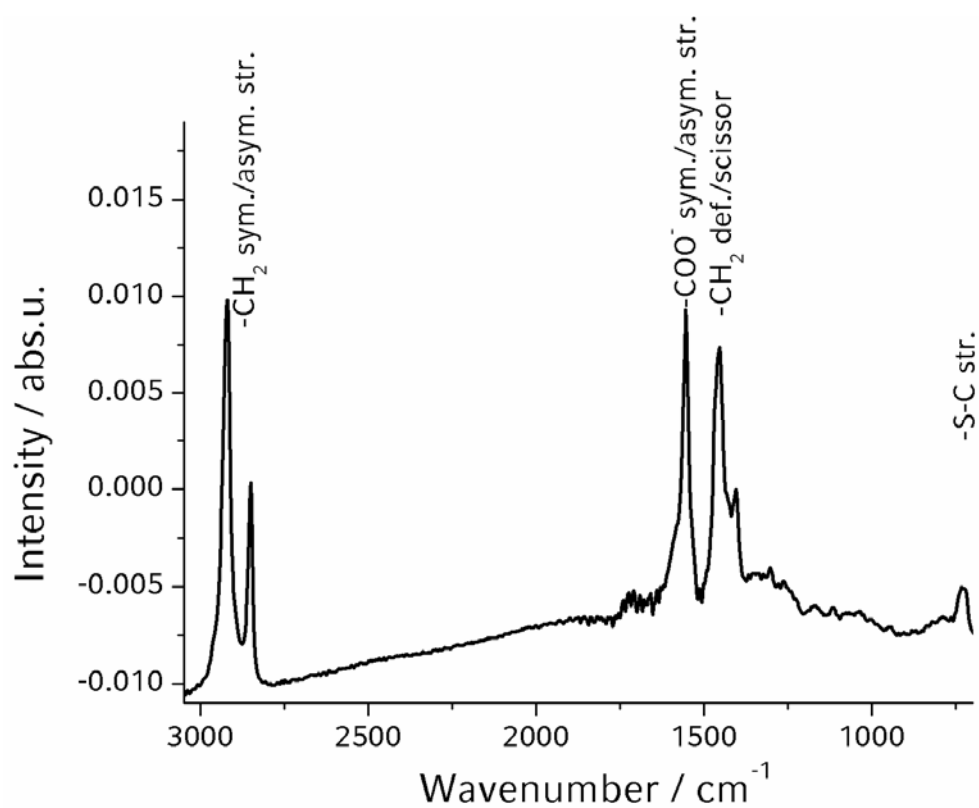

Figure S1: RAIR-spectrum of the MHDA self-assembled monolayer on a gold substrate.

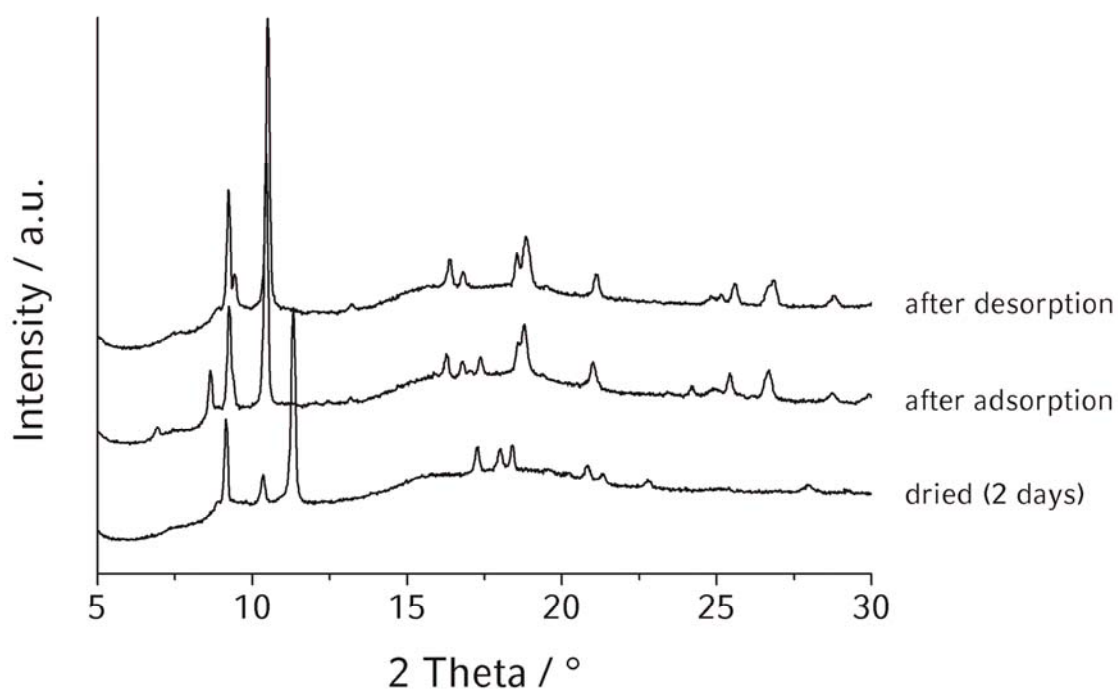

Figure S2: XRD pattern of the ethanolic form of bulk NH<sub>2</sub>-Fe-MIL-88B crystals showing the effect of extended drying.

Table S1 Lattice parameter *c* of Fe-MIL-88B after indexing using Werner algorithm for different relative pressures of ethanol.

| <b>p/p<sub>0</sub></b> | <b>2 Theta</b> | <b>lattice-parameter <i>c</i> / Å<sup>3</sup></b> |
|------------------------|----------------|---------------------------------------------------|
| <b>0,00</b>            | <b>9,18</b>    | <b>19,3</b>                                       |
| <b>0,02</b>            | <b>9,22</b>    | <b>19,2</b>                                       |
| <b>0,20</b>            | <b>9,23</b>    | <b>19,2</b>                                       |
| <b>0,40</b>            | <b>9,24</b>    | <b>19,1</b>                                       |
| <b>0,60</b>            | <b>9,24</b>    | <b>19,1</b>                                       |
| <b>0,80</b>            | <b>9,25</b>    | <b>19,1</b>                                       |
| <b>0,60</b>            | <b>9,24</b>    | <b>19,1</b>                                       |
| <b>0,40</b>            | <b>9,23</b>    | <b>19,1</b>                                       |
| <b>0,20</b>            | <b>9,22</b>    | <b>19,2</b>                                       |
| <b>0,02</b>            | <b>9,22</b>    | <b>19,2</b>                                       |
| <b>0,00</b>            | <b>9,18</b>    | <b>19,3</b>                                       |

Table S2 Lattice parameter  $c$  of  $\text{NH}_2\text{-Fe-MIL-88B}$  after indexing using Werner algorithm for different relative pressures of ethanol.

| $p/p_0$ | 2 Theta | lattice-parameter $c / \text{\AA}^3$ |
|---------|---------|--------------------------------------|
| 0,00    | 9,09    | 19,4                                 |
| 0,02    | 9,10    | 19,4                                 |
| 0,20    | 9,12    | 19,4                                 |
| 0,40    | 9,19    | 19,2                                 |
| 0,60    | 9,22    | 19,2                                 |
| 0,80    | 9,24    | 19,1                                 |
| 0,60    | 9,24    | 19,1                                 |
| 0,40    | 9,23    | 19,2                                 |
| 0,20    | 9,22    | 19,2                                 |
| 0,02    | 9,20    | 19,2                                 |
| 0,00    | 9,16    | 19,3                                 |

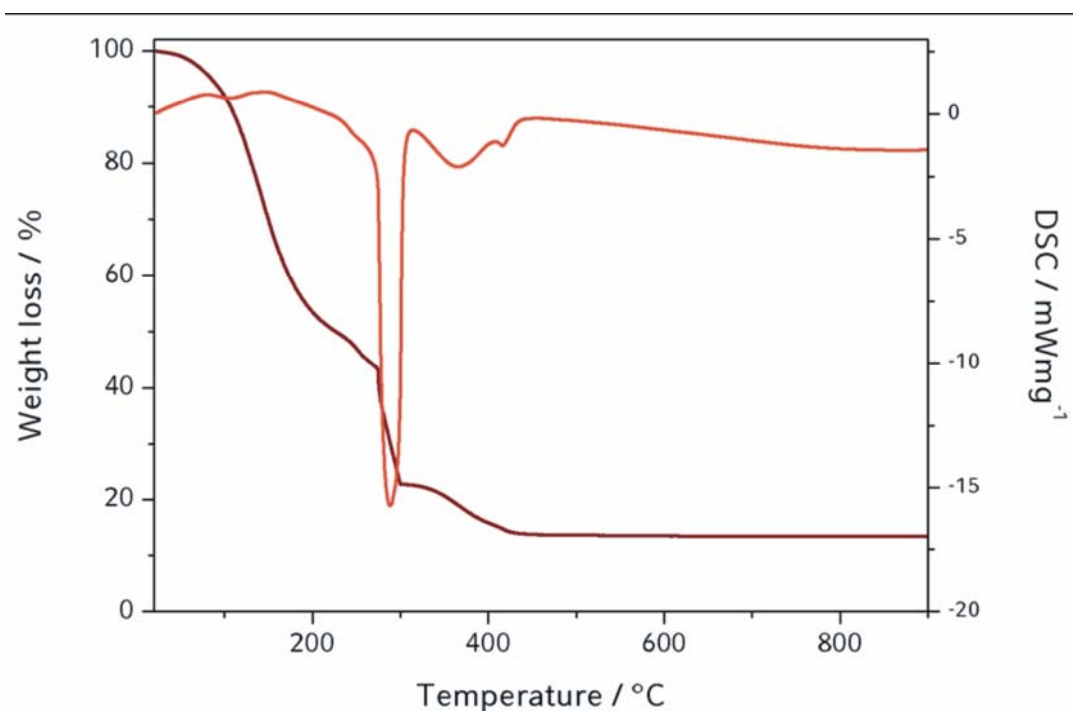

Figure S3: TGA and DSC data of  $\text{NH}_2\text{-Fe-MIL-101}$ . The first step of 56 wt. % in the TGA is assigned to the loss of solvent and water molecules from inside the pores. The decomposition of the organic parts of  $\text{NH}_2\text{-MIL-101}$  subsequently takes place above 250 °C within two steps, which can also be seen in the differential scanning calorimetry (DSC) in red. These two steps show a weight loss of 30 % and of 70 % corresponding to the crystals with filled pores and those with empty pores, respectively. This 70 % weight loss is in good agreement with the weight fraction of the organic parts of  $\text{NH}_2\text{-Fe-MIL-101}$  ( $\text{Fe}_3\text{O}(\text{NH}_2\text{BDC})_3$ ), which can be calculated as 75 wt. %.

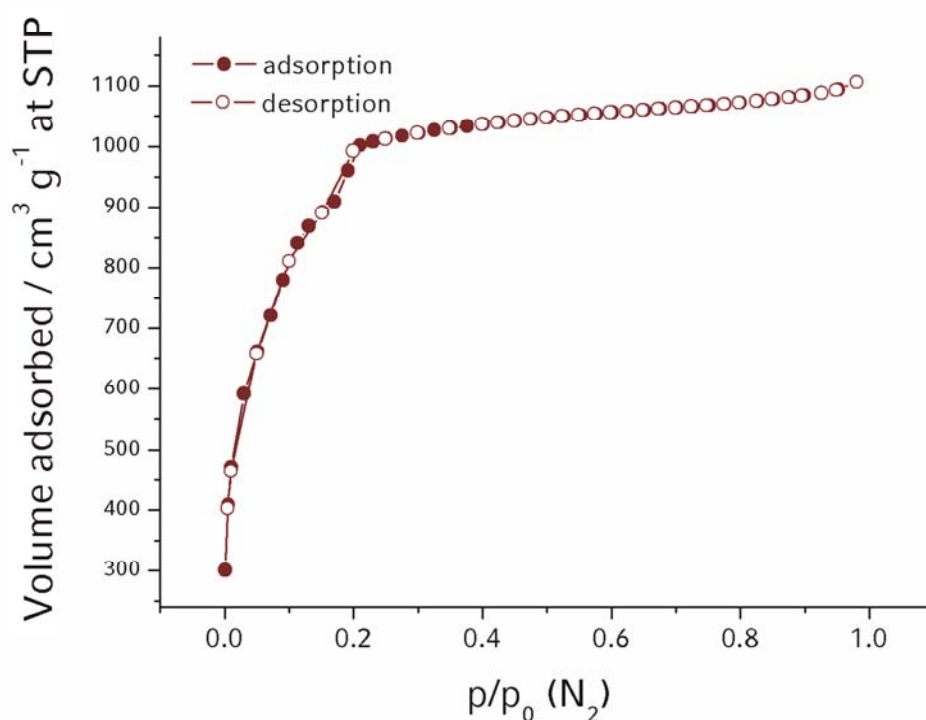

Figure S4: Nitrogen sorption isotherm at 77 K for bulk  $NH_2$ -Fe-MIL-101. The Type I isotherm of the amino-functionalized  $NH_2$ -Fe-MIL-101 is very similar to the isotherm of the unfunctionalized compound reported in the literature. The shapes of the isotherms are nearly identical, both providing a small step in the adsorption curve at 0.2  $p/p_0$ . The overall adsorbed volume of nitrogen is slightly smaller for  $NH_2$ -Fe-MIL-101 than for MIL-101, which can be attributed to the amino groups present in the framework. The fact that the adsorption capacity of the material is only slightly reduced by the amino functionalization is of interest for thin film growth and for possible applications of these functionalized MOF thin films.

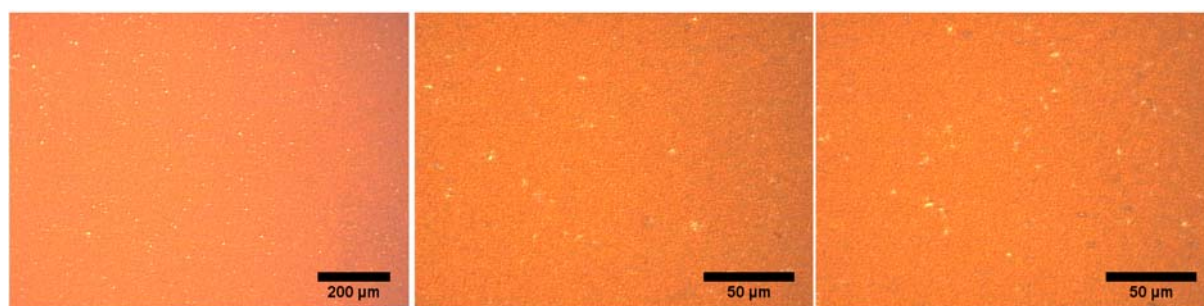

Figure S5: Optical light microscope images of  $NH_2$ -MIL-88B thin films with different magnifications (**left**: x10 objective, **middle**: x50, **right**: x50) illustrating the formation of homogeneous and densely packed thin films. No obvious cracks are visible prior to an exposure to vacuum.

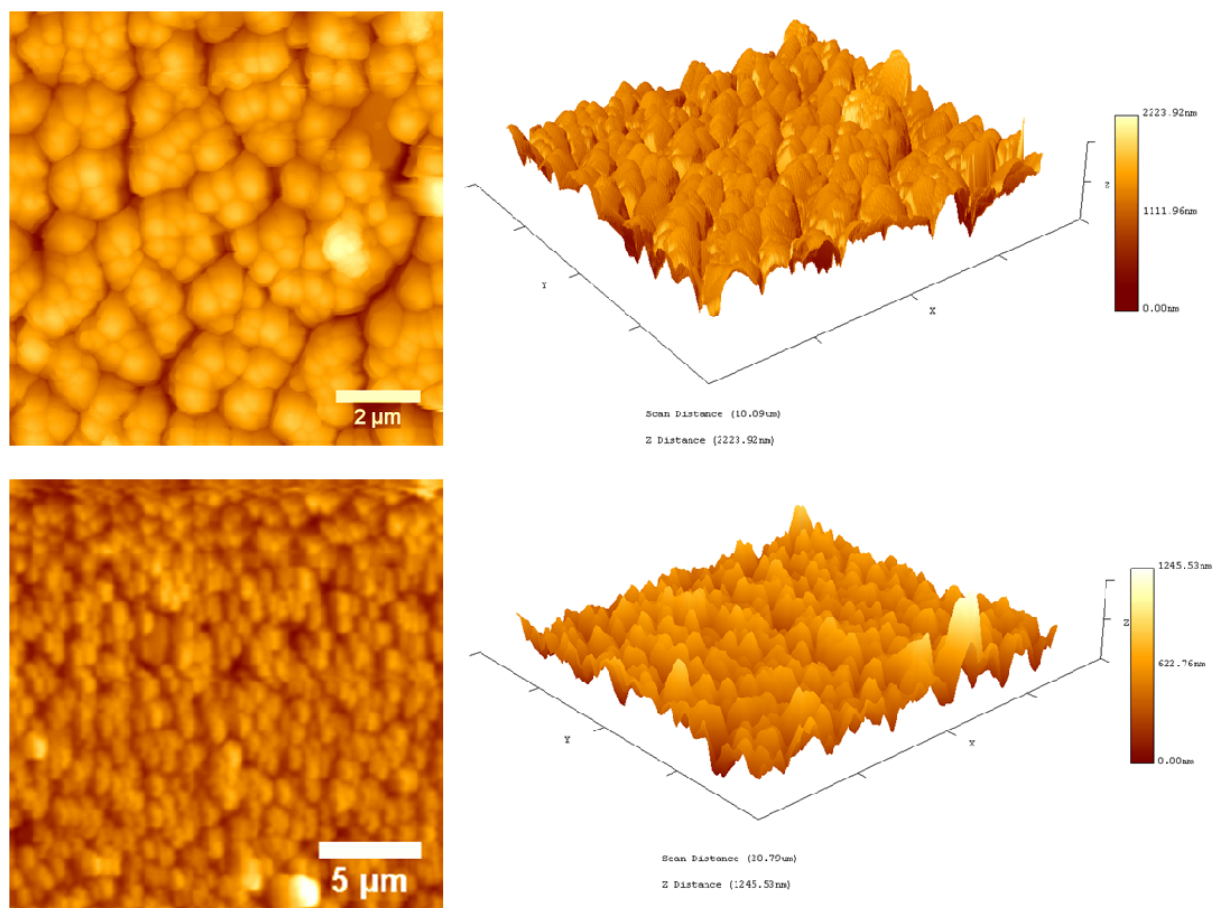

Figure S6: Atomic force micrographs of NH<sub>2</sub>-MIL-88B thin films prepared from the batch containing a HCl content of Fe<sup>3+</sup> : HCl = 1 : 0.5. The AFM images show a rather dense layer of intergrown NH<sub>2</sub>-MIL-88B crystals completely covering the gold surface (**left column:** top view image; **right column:** height field image). AFM pictures are displayed for two differently scaled sections (**top:** 10 μm, **bottom:** 20 μm).

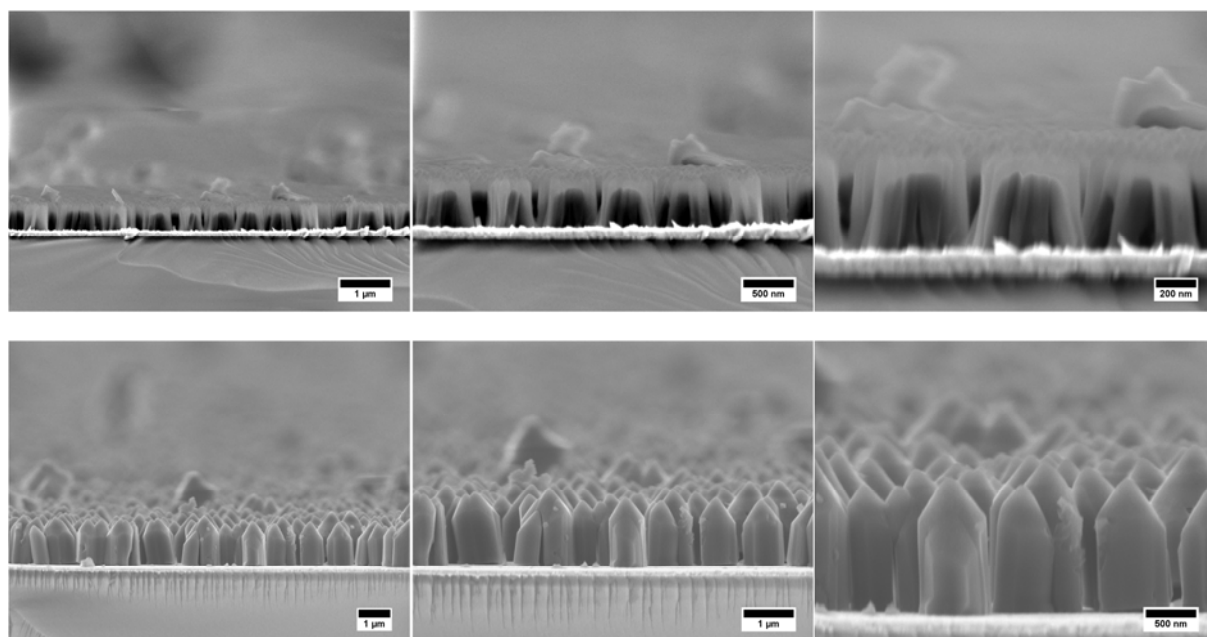

Figure S7: Scanning electron micrographs of  $\text{NH}_2\text{-MIL-88B}$  thin films grown from crystallization solutions with different  $\text{HCl}$  content (**top:**  $\text{Fe}^{3+} : \text{HCl} = 1 : 1$ ; **bottom:**  $\text{Fe}^{3+} : \text{HCl} = 1 : 0.5$ ). The immersion time of the substrates in the crystallization solution was 11 days for both samples. The film thickness obviously depends on the different experimental conditions. As revealed by the cross-sections, an almost three-fold thicker layer of  $\text{NH}_2\text{-MIL-88B}$  crystals is obtained for the batch prepared with  $\text{Fe}^{3+} : \text{HCl} = 1 : 0.5$ .

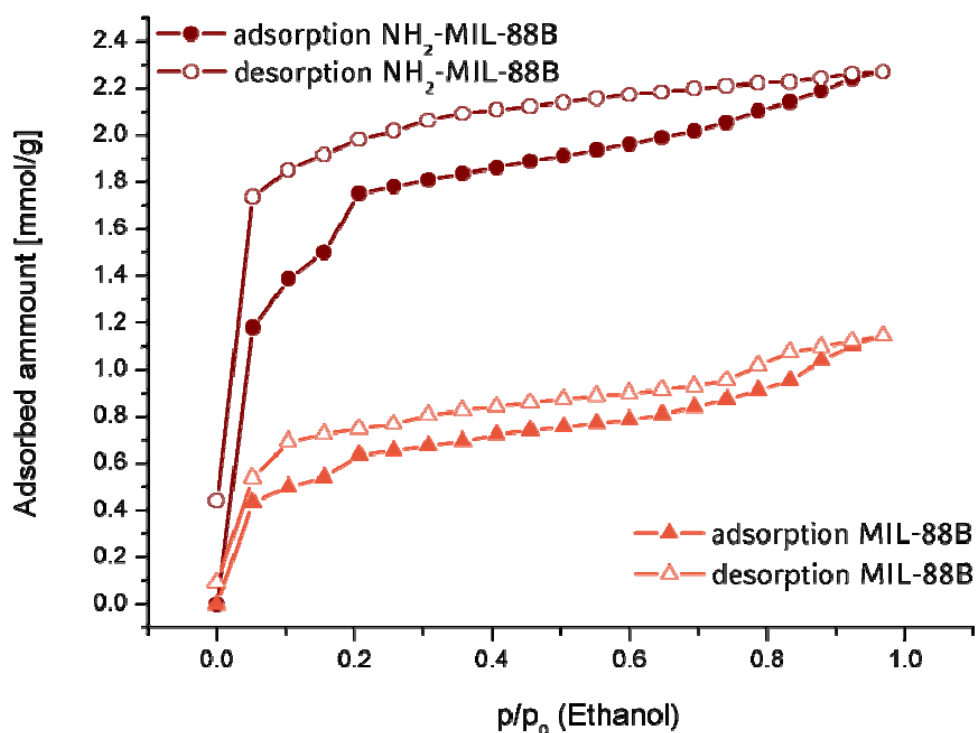

Figure S8: Reproduced sorption experiments showing the ethanol uptake of Fe-MIL-88B and  $\text{NH}_2\text{-Fe-MIL-88B}$  thin films, recorded with a quartz crystal microbalance at room temperature. The adsorbed amount of ethanol up to a relative pressure of 0.16 is almost three times as much as for the unfunctionalized counterpart. The fact that the isotherms are not closing completely is attributed to very long equilibration times for the last desorption step.



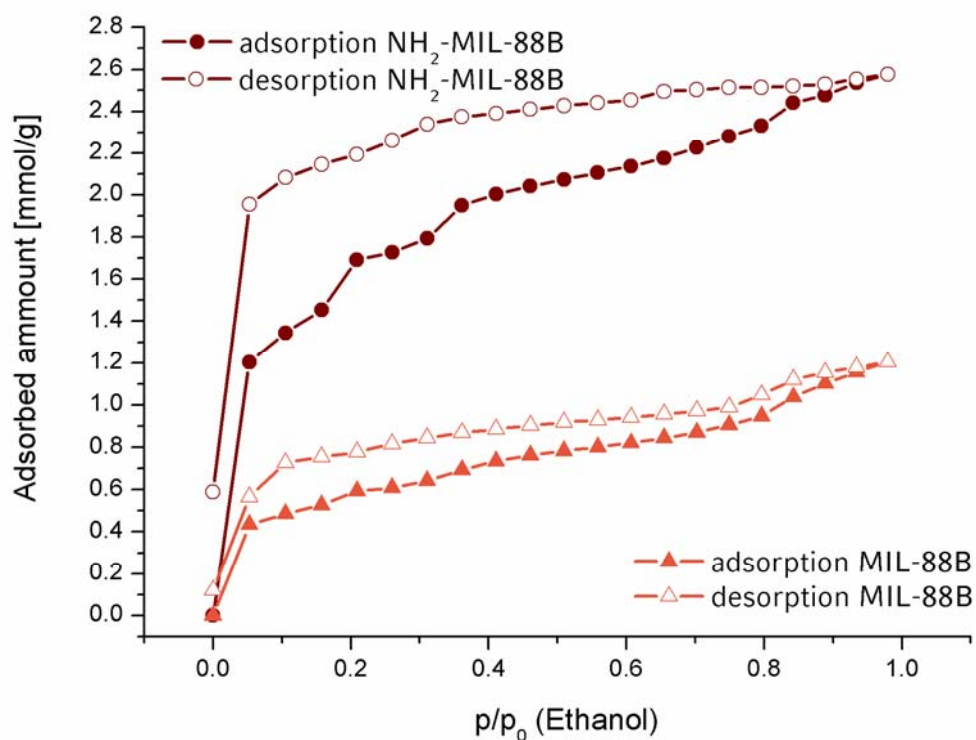

Figure S9: Ethanol sorption isotherms of Fe-MIL-88B and  $\text{NH}_2\text{-Fe-MIL-88B}$  thin films providing evidence for the reproducibility of the quartz crystal microbalance experiment at room temperature. The fact that the isotherms are not closing completely is attributed to very long equilibration times for the last desorption step.
